# Supplementary material for: Early Changes in Androgen Levels in Individuals with Spinal Cord Injury: A Longitudinal SwiSCI Study
Source: MDPI journal article supplement (doi:10.3390/jcm11216559), 2022-11-04
Supplement: s1 [file s1]

## 1. ONLINE SUPPLEMENTARY

### Content

|                                                                                                                                                                      |    |
|----------------------------------------------------------------------------------------------------------------------------------------------------------------------|----|
| 1. ONLINE SUPPLEMENT .....                                                                                                                                           | 1  |
| Table S1. Detailed description of hormone measurements.....                                                                                                          | 2  |
| Table S2. Causes of Non-traumatic spinal cord injury .....                                                                                                           | 4  |
| Table S3. Association between individual patient and injury's characteristics and hormone levels at baseline, analysis restricted to men with traumatic injury ..... | 5  |
| Table S4. Longitudinal changes in androgens, analysis restricted to men with traumatic spinal cord injury .....                                                      | 6  |
| Table S5. Longitudinal changes in sex hormones (Wilcoxon sign test and Linear mixed models) .....                                                                    | 7  |
| Figure S1. Sexual dysfunction as reported by study participants at T2 (70–98 days post-injury).....                                                                  | 8  |
| Figure S2. Association between age and androgens in men with spinal cord injury .....                                                                                | 9  |
| Figure S3. Association between age and androgens in women with spinal cord injury .....                                                                              | 10 |
| Figure S4. Association between age and androgens in men with motor complete traumatic SCI.....                                                                       | 11 |
| Figure S5. Association between time since injury and androgens in men with spinal cord injury .....                                                                  | 12 |
| Figure S6. Association between time since injury and androgens in women with spinal cord injury .....                                                                | 13 |
| Figure S7. Bivariate plots of changes in androgen sex hormone levels in men with spinal cord injury .....                                                            | 14 |
| Figure S8. Bivariate plots of changes in androgen sex hormone levels in women with spinal cord injury .....                                                          | 15 |

**Table S1.** Detailed description of hormone measurements

| Sex Hormone                         | Assay <sup>1</sup>                                    | Manufacturer/supplier                                       | Type of standard curve                                                                                      | Volume of sample used                                           | Lower detection limit        | Intra-Assay Coefficient of variability (CV)                                                                                             | Inter-assay coefficient of variability (CV) | Normal range according to manufacturer                                                      |
|-------------------------------------|-------------------------------------------------------|-------------------------------------------------------------|-------------------------------------------------------------------------------------------------------------|-----------------------------------------------------------------|------------------------------|-----------------------------------------------------------------------------------------------------------------------------------------|---------------------------------------------|---------------------------------------------------------------------------------------------|
| Total testosterone (TT)             | Competitive Enzyme Linked Immunosorbent Assay (ELISA) | Abcam, Lucerna-Chem AG, Switzerland (cat.no: ab174569)      | 7-point standard curve in duplicate                                                                         | 25 µl of serum per well for 40 samples in duplicate (80 wells)  | 0.0083 ng/ml (0.0288 nmol/L) | 4.16%, 3.28%, 3.34% for 0.73ng/ml (2.53 nmol/L), 4.88ng/ml (16.92 nmol/L), and 11.26ng/ml (39.04 nmol/L) mean values of TT respectively | <10%                                        | 6.94-23-94 nmol/L for males and 0.90-4.23 nmol/L for females.                               |
| Free testosterone (FT)              | Competitive Enzyme Linked Immunosorbent Assay (ELISA) | Abcam, Lucerna-Chem AG, Switzerland (cat.no:ab178663)       | 6-point standard curve including positive and negative controls in duplicate                                | 20 µl of serum per well for 38 samples in duplicate (76 wells)  | 0.06 pg/ml (0.21 pmol/L)     | <10%                                                                                                                                    | <10%                                        | 4.5-42 pg/ml (15.6-145.7 pmol/L) for males and 0.1-4.1 pg/ml (0.35-14.2 pmol/L) for females |
| Sex Hormone Binding Globulin (SHBG) | Sandwich Enzyme Linked Immunosorbent Assay (ELISA)    | Abcam, Lucerna-Chem AG, Switzerland (SHBG, cat.no:ab260070) | 7-point standard curve in duplicate                                                                         | 50 µl of serum per well for 40 samples in duplicate (80 wells)  | 26 pg/ml (0.023 nmol/L)      | 3.8%                                                                                                                                    | 4.6%                                        | No recommended physiological reference ranges were provided by the kit manufacturer         |
| Dehydroepiandrosterone (DHEA)       | Competitive Enzyme Linked Immunosorbent Assay (ELISA) | Abnova, Lucerna-Chem AG, Switzerland (cat.no:KA0315)        | 7-point standard curve including non-specific binding, zero activity, and total activity wells in duplicate | 100 µl of serum per well for 36 samples in duplicate (72 wells) | 2.9 pg/ml (0.01 nmol/L)      | <10%                                                                                                                                    | <10%                                        | No recommended physiological reference ranges were provided by the kit manufacturer         |

|                                                           |                                                       |                                                              |                                             |                                                      |                            |     |     |                                                                                                                                                                       |
|-----------------------------------------------------------|-------------------------------------------------------|--------------------------------------------------------------|---------------------------------------------|------------------------------------------------------|----------------------------|-----|-----|-----------------------------------------------------------------------------------------------------------------------------------------------------------------------|
| Dehydroepiandrosterone sulphate (DHEAs)                   | Competitive Enzyme Linked Immunosorbent Assay (ELISA) | Abnova, Lucerna-Chem AG, Switzerland (DHEA-S, cat.no:KA0920) | 7-point standard curve was run in duplicate | 10 µl of serum per well for 40 samples in duplicate. | 0.0236 ug/ml (0.06 umol/L) | <5% | <5% | normal ranges in males and females are 1.0-4.2 µg/mL (2.71-11.40 umol/L) and 0.1 to 3.9 ug/ml (0.27-10.58 umol/L) respectively according to manufacturer`s guidelines |
| <sup>1</sup> The assays were performed on 96 well plates. |                                                       |                                                              |                                             |                                                      |                            |     |     |                                                                                                                                                                       |

**Table S2. Causes of Non-traumatic spinal cord injury**

| Medical condition                                              | Frequency n= 25 (%) |
|----------------------------------------------------------------|---------------------|
| Spinal cord compression due to combination of multiple factors | 3 (12)              |
| Neoplasm                                                       | 3 (12)              |
| Bacterial infection                                            | 1 (4)               |
| Spinal stenosis                                                | 4 (16)              |
| Demyelination                                                  | 1 (4)               |
| Malignant neoplasm                                             | 1 (4)               |
| Vascular malformations                                         | 2 (8)               |
| Vertebral column degenerative disorders                        | 1 (4)               |
| Viral infection                                                | 1 (4)               |
| Inflammatory and Auto-immune Diseases                          | 1 (4)               |
| Vascular disorders (unknown)                                   | 1 (4)               |
| Vascular disorders (Ischaemia)                                 | 3 (12)              |
| Vascular disorders (Haemorrhage)                               | 1 (4)               |
| Infection (unknown)                                            | 1 (4)               |
| Miscellaneous (Unknown)                                        | 1 (4)               |

**Table S3. Association between individual patient and injury's characteristics and hormone levels at baseline, analysis restricted to men with traumatic injury**

|                                                                                                                                                                                                                                                                                                                                                                                                                                                                           | Men with traumatic injury (N=52)          |                                             |                                  |                                |                               |
|---------------------------------------------------------------------------------------------------------------------------------------------------------------------------------------------------------------------------------------------------------------------------------------------------------------------------------------------------------------------------------------------------------------------------------------------------------------------------|-------------------------------------------|---------------------------------------------|----------------------------------|--------------------------------|-------------------------------|
|                                                                                                                                                                                                                                                                                                                                                                                                                                                                           | Total testosterone<br>( $\beta$ , 95% CI) | Free<br>Testosterone<br>( $\beta$ , 95% CI) | SHBG<br>( $\beta$ , 95% CI)      | DHEA<br>( $\beta$ , 95% CI)    | DHEAs<br>( $\beta$ , 95% CI)  |
| <b>Injury level</b>                                                                                                                                                                                                                                                                                                                                                                                                                                                       |                                           |                                             |                                  |                                |                               |
| Paraplegics                                                                                                                                                                                                                                                                                                                                                                                                                                                               | 1.58 (-2.66, 5.81)                        | 31.29 (-52.16, 114.75)                      | 25.25 (-426.65, 477.15)          | -3.01 (-12.97, 6.96)           | -1.53 (-3.61, 0.55)           |
| <b>Injury completeness</b>                                                                                                                                                                                                                                                                                                                                                                                                                                                |                                           |                                             |                                  |                                |                               |
| incomplete                                                                                                                                                                                                                                                                                                                                                                                                                                                                | 3.38 (-0.85, 7.62)                        | 36.64 (-54.83, 128.11)                      | 220.35 (-248.93, 689.63)         | <b>-10.05 (-19.63, -0.46)*</b> | <b>-2.04 (-3.93, -0.15)*</b>  |
| <b>Medication use</b>                                                                                                                                                                                                                                                                                                                                                                                                                                                     |                                           |                                             |                                  |                                |                               |
| Opioids use                                                                                                                                                                                                                                                                                                                                                                                                                                                               | 3.03 (-1.18, 7.24)                        | -49.90 (-132.50, 32.70)                     | <b>559.52(208.09, 910.94) **</b> | -8.09 (-16.35, 0.16)           | <b>-2.57 (-4.16, -0.99)**</b> |
| Corticosteroids use                                                                                                                                                                                                                                                                                                                                                                                                                                                       | 3.38 (-1.83, 8.59)                        | 85.30 (-42.95, 213.54)                      | 102.09 (-611.27, 815.46)         | 17.47 (-8.44, 43.38)           | 2.05 (-0.84, 4.94)            |
| <p>*P value&lt;0.05 ** P&lt;0.01 *** P&lt;0.001<br/>           ‡analysis was not possible due to small number of corticosteroid users among individuals with traumatic motor complete injury<br/>           Abbreviations: TT: Total testosterone, SHBG: Sex Hormone Binding Globulin, DHEA: Dehydroepiandrosterone, DHEAs: Dehydroepiandrosterone sulfate, B=Beta estimate from linear regression<br/>           (Tetraplegics and complete SCI served as reference)</p> |                                           |                                             |                                  |                                |                               |

**Table S4. Longitudinal changes in androgens, analysis restricted to men with traumatic spinal cord injury**

|                                                                                                                              | Beginning of Rehabilitation<br>mean (SD) | End of Rehabilitation<br>mean (SD) | p-value<br>(paired t<br>test) | Unadjusted model<br>( $\beta$ , 95% CI) | p-value<br>(LMM)  | Model 1<br>( $\beta$ , 95% CI) | p-value<br>(LMM) |
|------------------------------------------------------------------------------------------------------------------------------|------------------------------------------|------------------------------------|-------------------------------|-----------------------------------------|-------------------|--------------------------------|------------------|
| <b>Men (N= 52)</b>                                                                                                           |                                          |                                    |                               |                                         |                   |                                |                  |
| Total testosterone,<br>nmol/L                                                                                                | 12.8 (6.8)                               | 16.8 (5.5)                         | <b>0.0007</b>                 | 4.04 (1.85, 6.23)                       | <b>&lt;0.0001</b> | 4.69 (1.53, 7.84)              | <b>0.004</b>     |
| Free testosterone,<br>pmol/L                                                                                                 | 288.1 (156.9)                            | 302.3 ( 185.6)                     | 0.56                          | 14.23 (-32.97, 61.42)                   | 0.56              | 24.07 (-42.15, 90.29)          | 0.48             |
| SHBG, nmol/L                                                                                                                 | 2.1 (0.7)                                | 2.1 (0.6)                          | 0.10                          | -0.06 (-0.14, 0.01)                     | 0.10              | -0.005 (-0.11, 0.10)           | 0.92             |
| DHEA, nmol/L                                                                                                                 | 24.5 (15.5)                              | 24.5 (19.7)                        | 1.00                          | 0.003 (-4.54, 4.55)                     | 1.00              | -1.05 (-8.21, 6.11)            | 0.77             |
| DHEAS, umol/L                                                                                                                | 4.5 (3.3)                                | 5.9 (4.4)                          | <b>0.002</b>                  | 1.43 (0.57, 2.29)                       | <b>0.001</b>      | 1.93 (0.59, 3.26)              | <b>0.005</b>     |
| Model 1: Adjusted for age, BMI, injury level, completeness of the injury, time since injury, opioids and corticosteroids use |                                          |                                    |                               |                                         |                   |                                |                  |

**Table S5. Longitudinal changes in sex hormones (Wilcoxon sign test and Linear mixed models)**

|                            | Beginning of Rehabilitation<br>Median (IQR) | End of Rehabilitation<br>Median (IQR) | p-value<br>(Wilcoxon Sign test) | Unadjusted model"<br>( $\beta$ , 95% CI;) | p-value<br>(LMM) | Model 1<br>( $\beta$ , 95% CI;) | p-value<br>(LMM)  |
|----------------------------|---------------------------------------------|---------------------------------------|---------------------------------|-------------------------------------------|------------------|---------------------------------|-------------------|
| <b>Men (N= 70)</b>         |                                             |                                       |                                 |                                           |                  |                                 |                   |
| Total testosterone, nmol/L | 12.5(7.9-17.7)                              | 16.4(11.7-19.8)                       | <b>0.02</b>                     | 3.66(1.87,5.46)                           | <0.0001          | 3.66(1.87,5.46)                 | <b>&lt;0.0001</b> |
| Free testosterone, pmol/mL | 274.7(169.3-366.4)                          | 268.0(187.6-362.69)                   | 0.55                            | 13.85(-26.89, 54.59)                      | 0.51             | 13.85(-26.89, 54.59)            | 0.51              |
| SHBG, pg/ml                | 2558 (2053-2777)                            | 2470 (2056-2829)                      | 1.00                            | -66.01(-140.40, 8.37)                     | 0.08             | -66.01(-140.40, 8.37)           | 0.08              |
| DHEA, nmol/L               | 20.2(12.8- 40.2)                            | 19.9(12.6-36.6)                       | 0.91                            | 0.65(-3.20,4.49)                          | 0.74             | 0.65(-3.20,4.49)                | 0.74              |
| DHEAS, umol/L              | 3.6(1.6-6.9)                                | 4.7(2.2-8.2)                          | <b>0.001</b>                    | 1.44(0.76, 2.12)                          | <0.0001          | 1.44(0.76, 2.12)                | <b>&lt;0.0001</b> |
| <b>Women (N=16)</b>        |                                             |                                       |                                 |                                           |                  |                                 |                   |
| Total testosterone, nmol/L | 1.9(1.4-2.5)                                | 1.7(1.3-2.6)                          | 1.00                            | 0.06(-0.47,0.60)                          | 0.82             | 0.07 (-0.47,0.61)               | 0.80              |
| Free testosterone, pmol/mL | 29.4(23.3-37.3)                             | 25.5(12.3-36.9)                       | 1.00                            | -2.09(-11.78, 7.60)                       | 0.67             | -2.09(-11.78, 7.60)             | 0.67              |
| SHBG, pg/ml                | 2890 (2020.5-3947)                          | 2916 (1936-3445.5)                    | 1.00                            | -3.06 (-322.10, 315.97)                   | 0.99             | -3.06 (-322.10, 315.97)         | 0.99              |
| DHEA, nmol/L               | 18.9(15.7-35.0)                             | 17.9(12.3-32.2)                       | 0.61                            | -7.11(-13.98,-0.24)                       | <b>0.04</b>      | -7.11(-13.98,-0.24)             | <b>0.04</b>       |
| DHEAS, umol/L              | 3.1(1.5-4.6)                                | 2.7(1.4-7.2)                          | 0.80                            | 1.01(-0.31, 2.32)                         | 0.13             | 1.01(-0.31, 2.32)               | 0.13              |
| Model 1: Adjusted for age  |                                             |                                       |                                 |                                           |                  |                                 |                   |

**Figure S1. Sexual dysfunction as reported by study participants at T2 (70–98 days post-injury)**

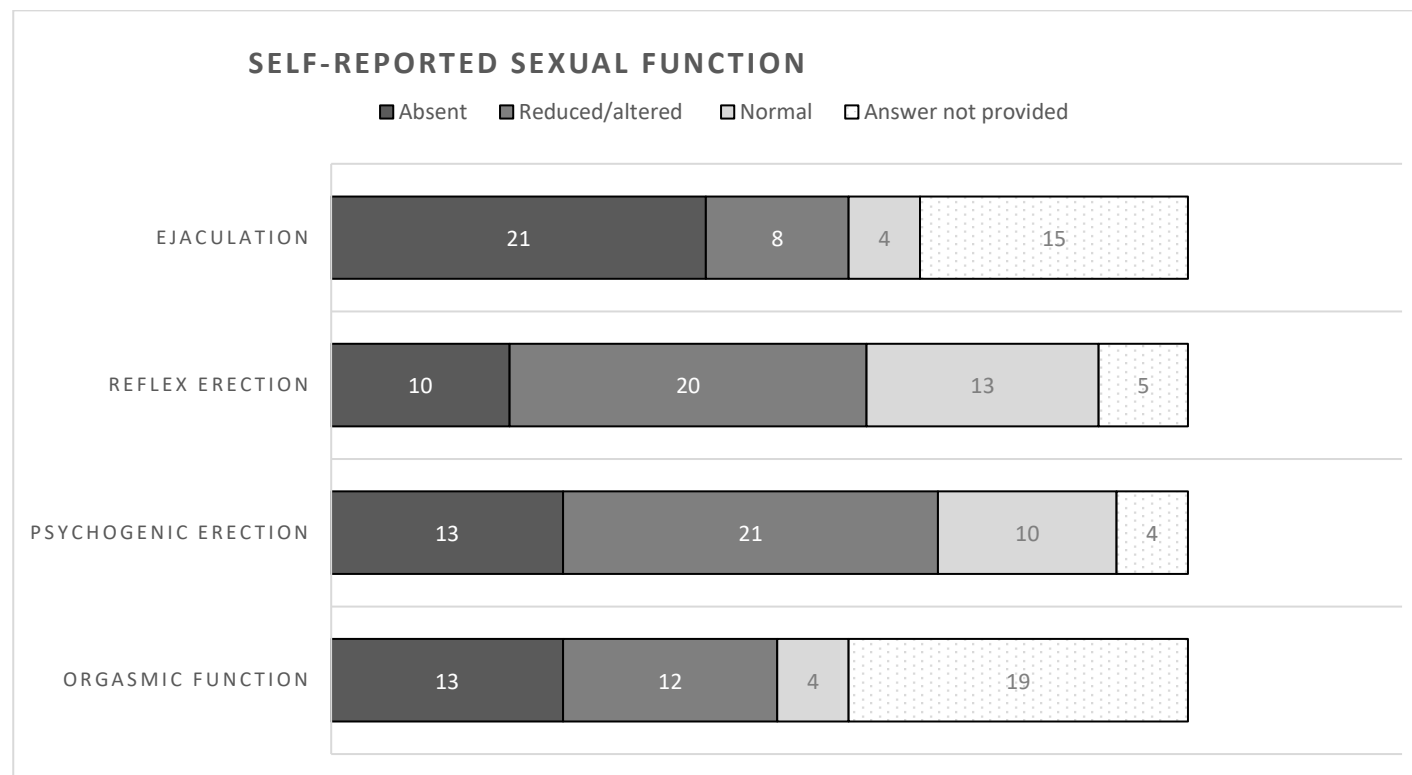



**Figure S2. Association between age and androgens in men with spinal cord injury**

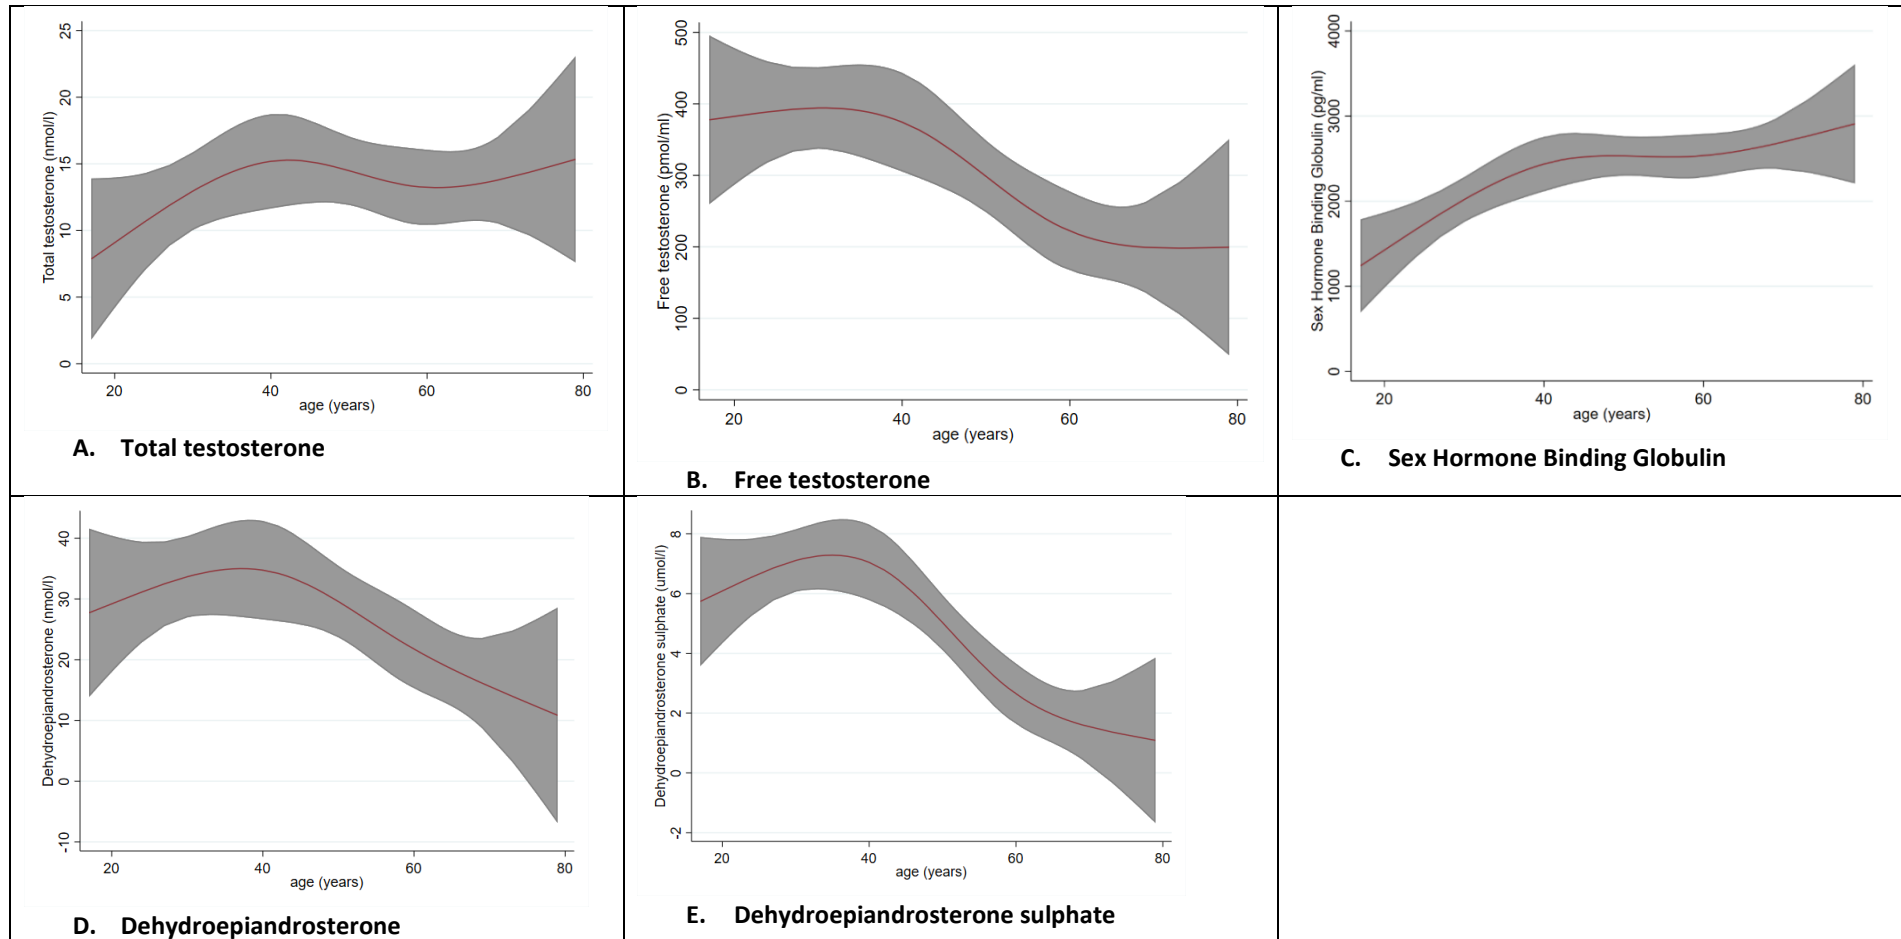

**Figure S3. Association between age and androgens in women with spinal cord injury**

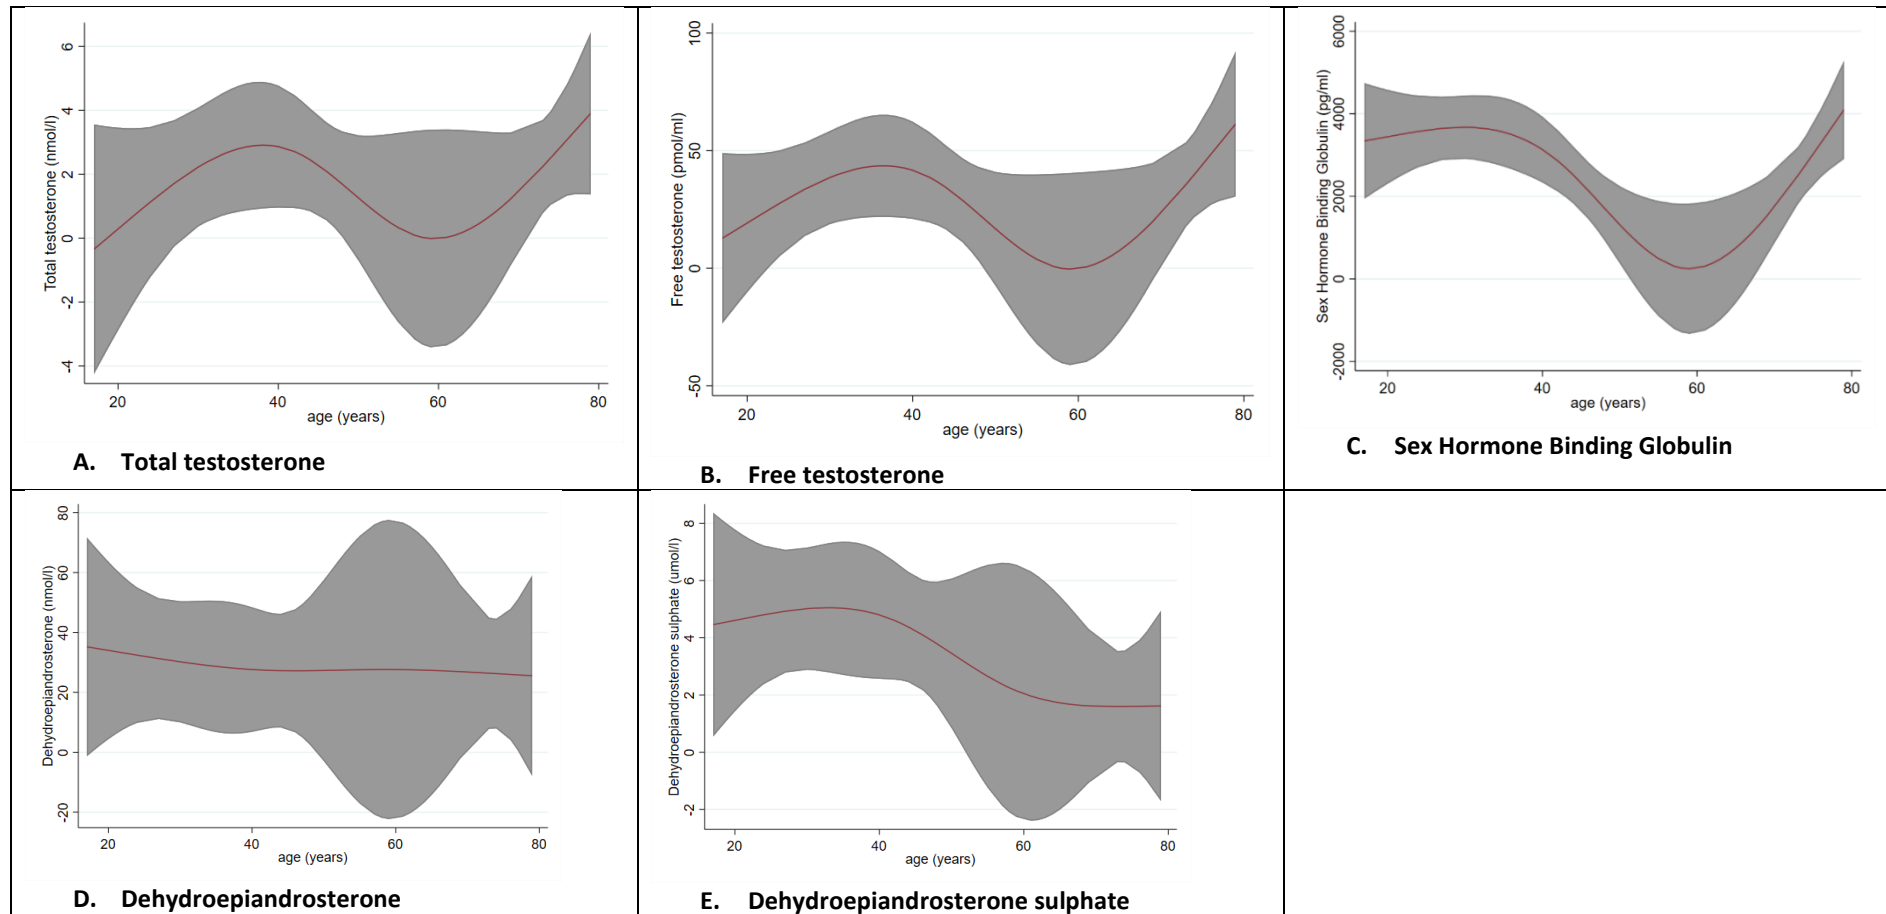

**Figure S4. Association between age and androgens in men with motor complete traumatic SCI**

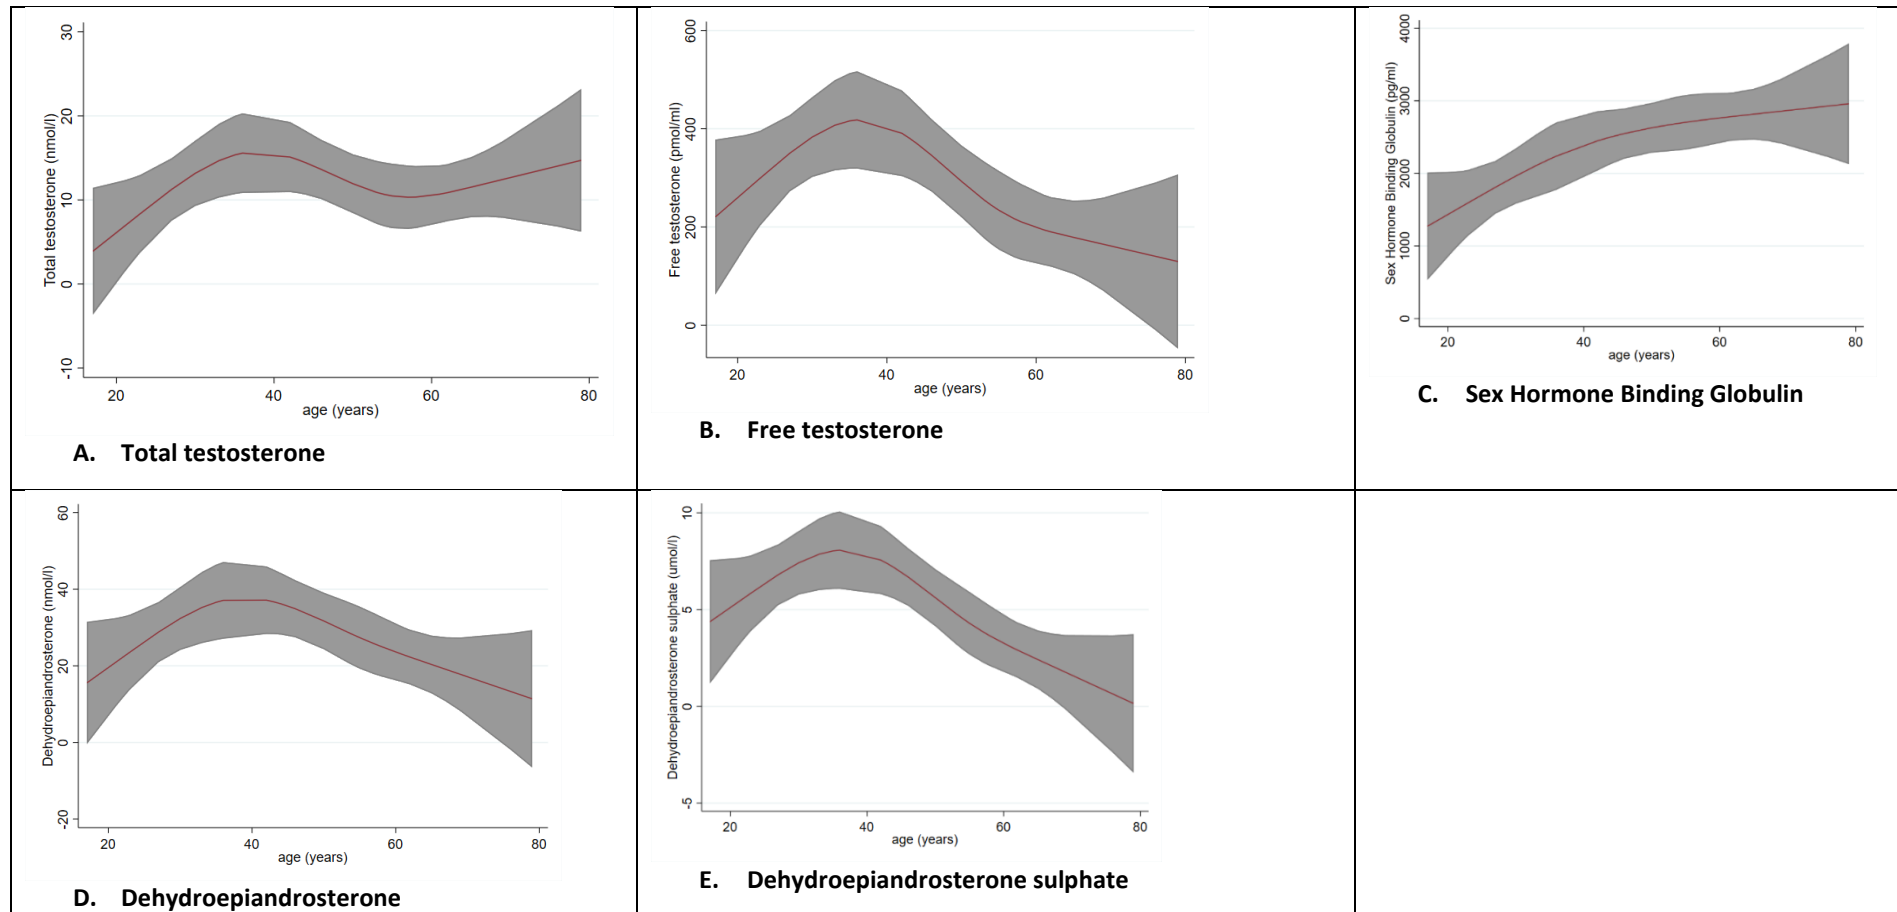

**Figure S5. Association between time since injury and androgens in men with spinal cord injury**

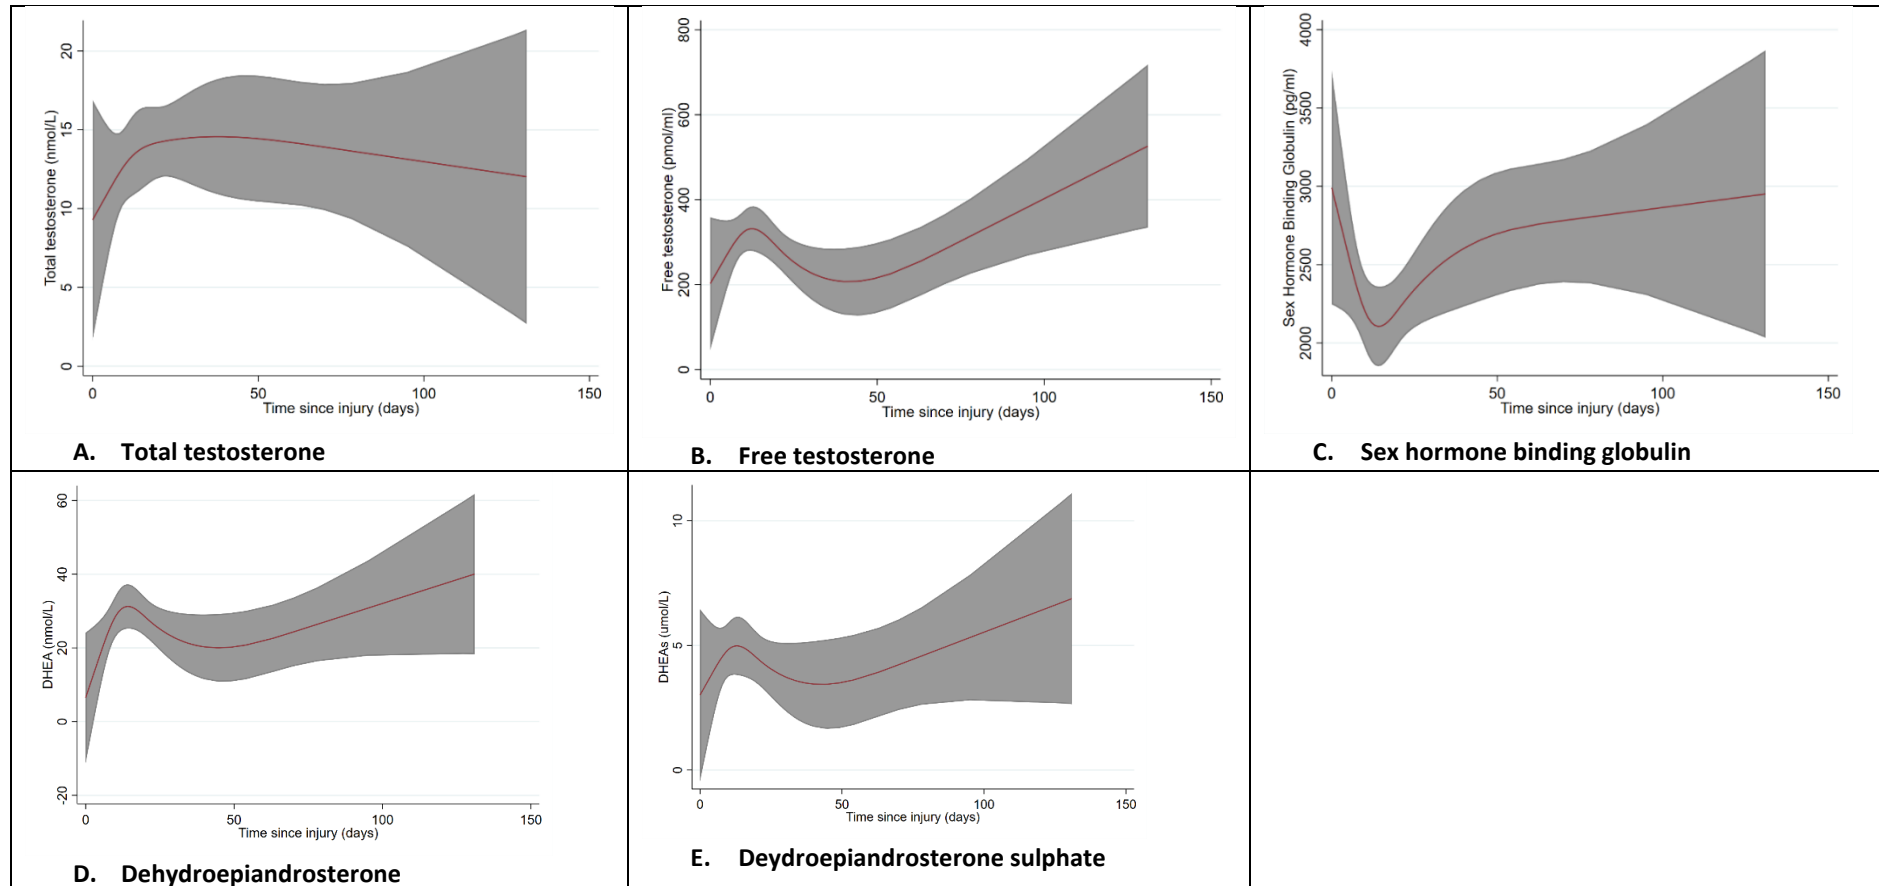

**Figure S6. Association between time since injury and androgens in women with spinal cord injury**

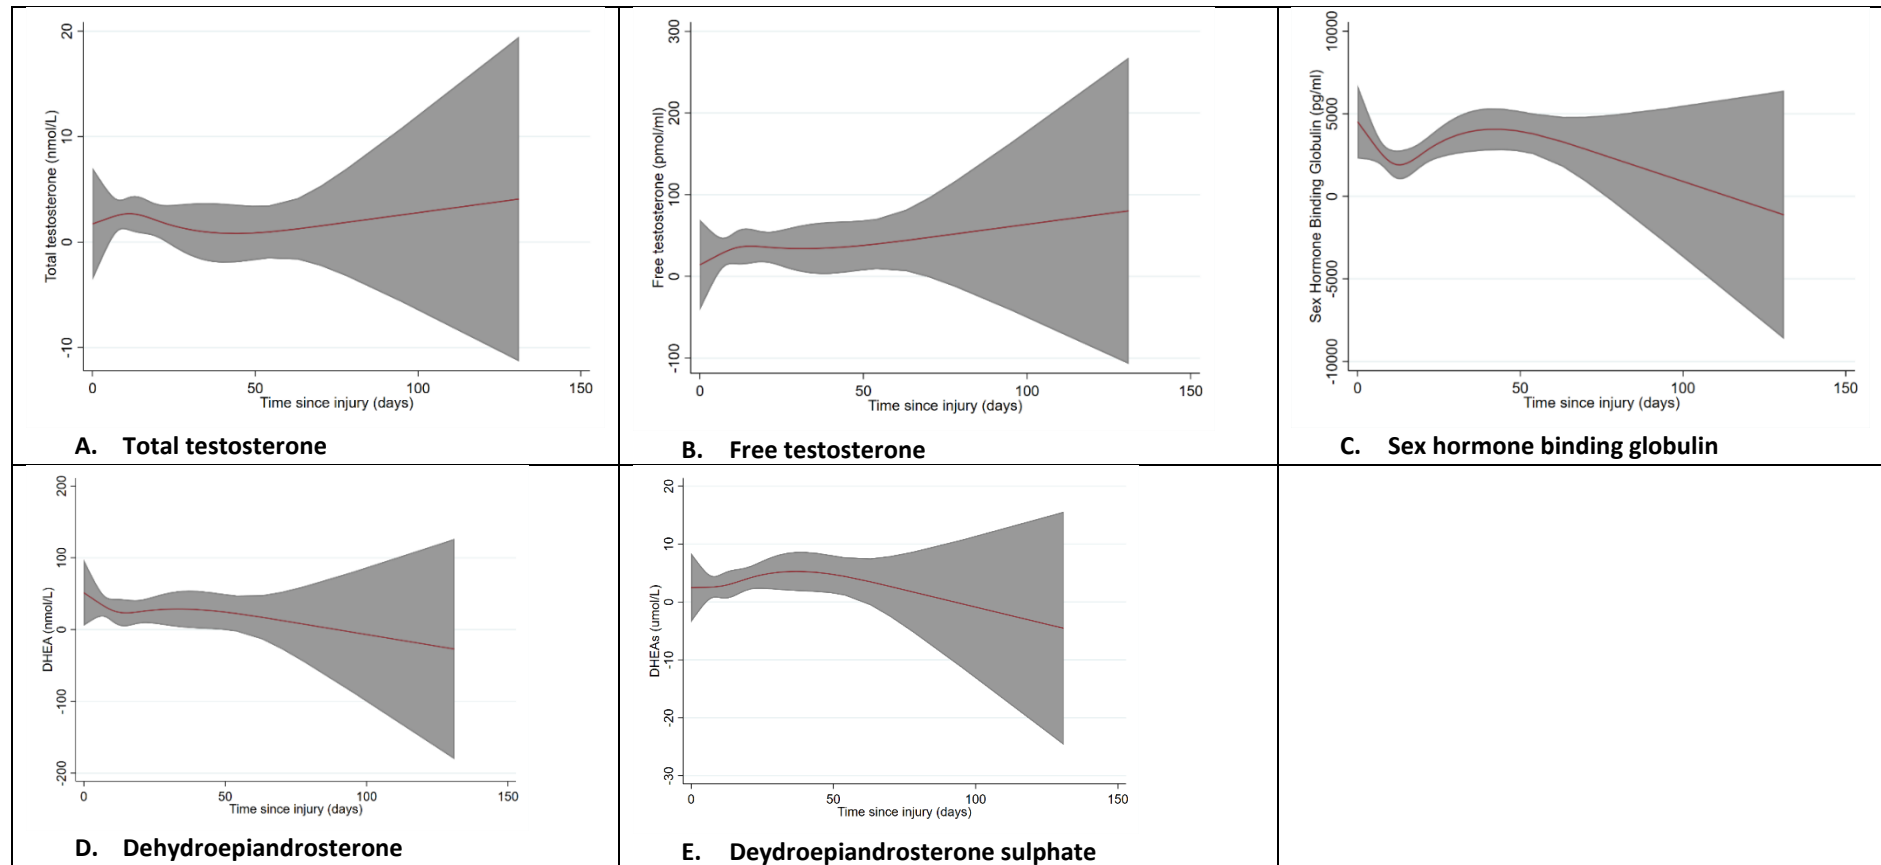

**Figure S7. Bivariate plots of changes in androgen sex hormone levels in men with spinal cord injury**

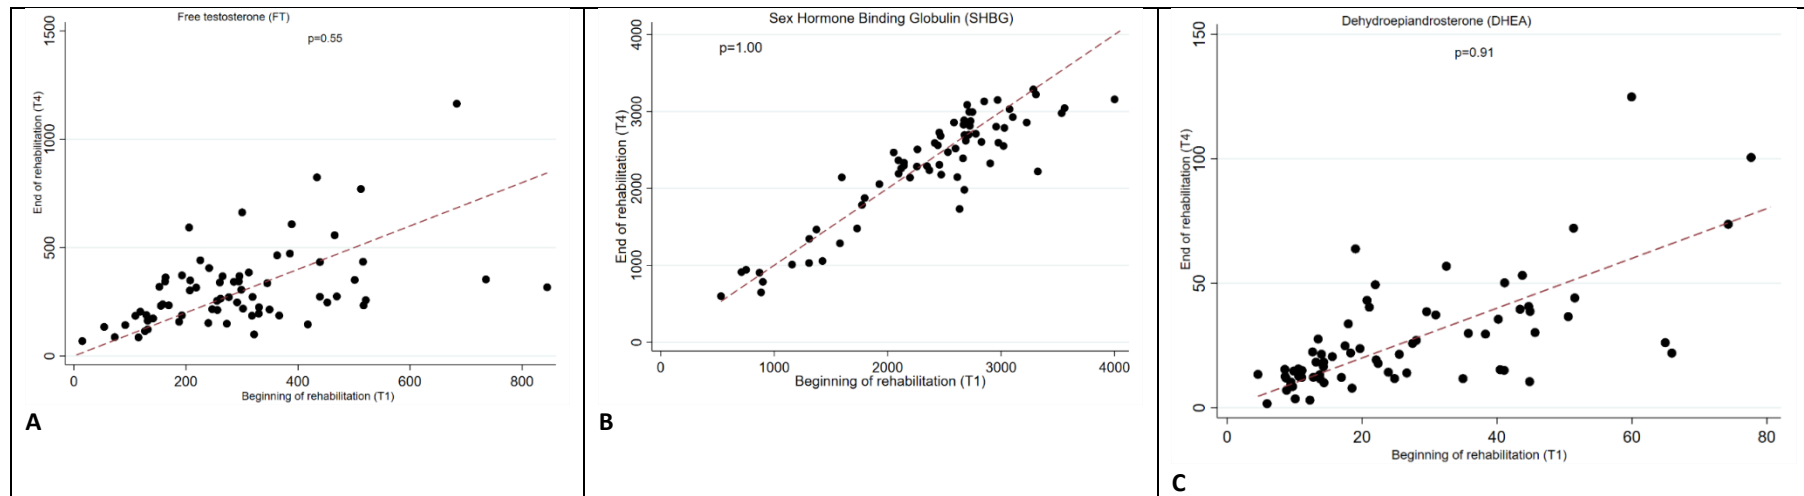

The bivariate plot shows individual changes in total testosterone and DHEA-S comparing the beginning and end of the rehabilitation period. A dotted line represents a line of no change. Every circle represents a person. A circle above the line indicates that a person had a higher level of androgen at follow-up as compared to baseline, whereas a circle below the line indicates that a person had a lower level of androgen at follow-up as compared to baseline.

**Figure S8. Bivariate plots of changes in androgen sex hormone levels in women with spinal cord injury**

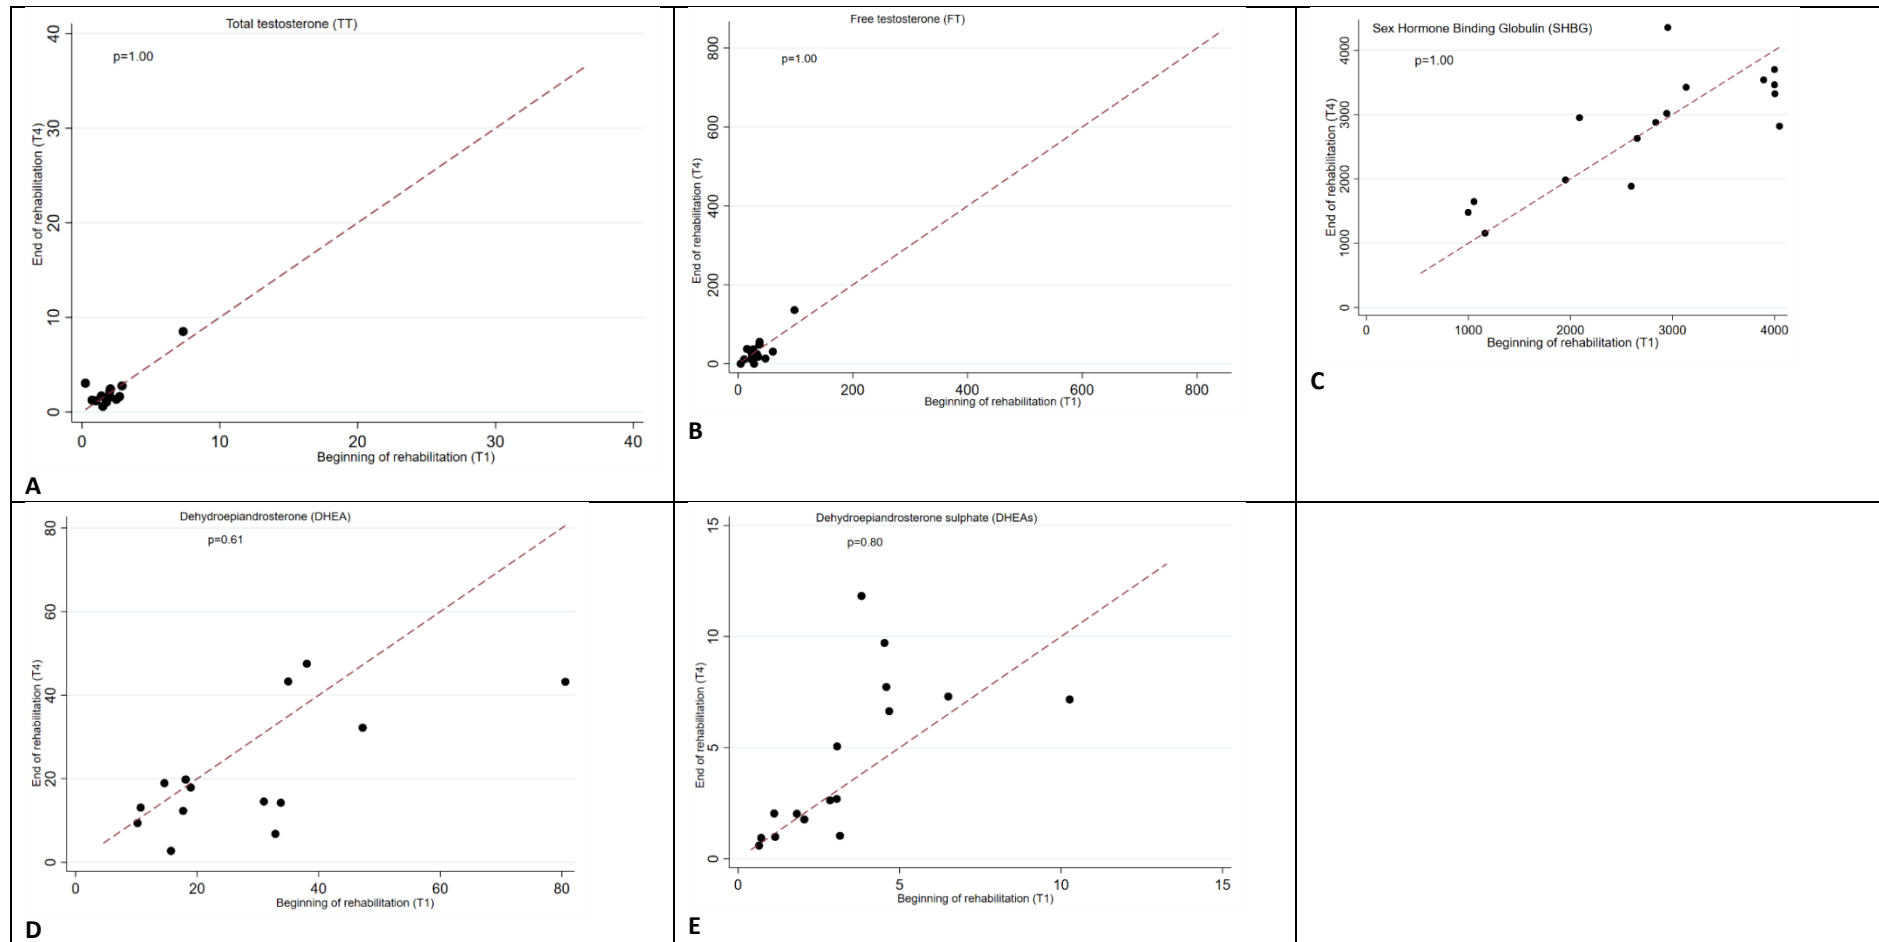

The bivariate plot shows individual changes in total testosterone and DHEA-S comparing the beginning and end of the rehabilitation period. A dotted line represents a line of no change. Every circle represents a person. A circle above the line indicates that a person had a higher level of androgen at follow-up as compared to baseline, whereas a circle below the line indicates that a person had a lower level of androgen at follow-up as compared to baseline.
